# Supplementary material
Source: HighWire-hosted journal article supplement (https://bmjopen.bmj.com/content/11/12/e048290)
Supplement: inline-supplementary-material-1 [file inline-supplementary-material-1.pdf]

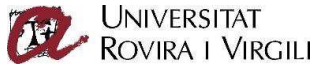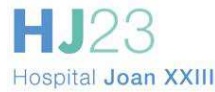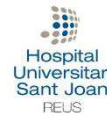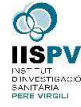

## INFORMACIÓN A LOS PARTICIPANTES

|               |                                                                                                                                                  |
|---------------|--------------------------------------------------------------------------------------------------------------------------------------------------|
| <b>TÍTULO</b> | Efecto de la ingesta de proteínas lácteas en el niño pequeño sobre el crecimiento y el posterior riesgo de obesidad: ensayo clínico aleatorizado |
|---------------|--------------------------------------------------------------------------------------------------------------------------------------------------|

|                 |                   |
|-----------------|-------------------|
| <b>ACRÓNIMO</b> | <b>TOMI Trial</b> |
|-----------------|-------------------|

### INVESTIGADORES PRINCIPALES:

Ricardo Closa Monasterolo. Jefe del Servicio de Pediatría. Hospital Universitari de Tarragona Joan 23  
Joaquín Escribano Subías. Jefe del Servicio de Pediatría. Hospital Universitari Sant Joan de Reus

**INTRODUCCIÓN:** Este documento es informativo sobre el proyecto de investigación que se indica en la cabecera, al cual les invitamos a participar. Les anticipamos que su participación es voluntaria y podrán realizar todas las preguntas que deseen, así como cambiar de opinión sobre su participación en cualquier momento. Su decisión no afectará la calidad de la atención sanitaria que reciba su hijo/a.

**OBJETIVO:** Este proyecto tiene como objetivo evaluar el efecto de dos fórmulas lácteas de crecimiento (con las mismas calorías, pero con diferente proporción de proteína y grasa) durante el segundo año de vida sobre el crecimiento desde el año hasta los 6 años.

**INTERVENCIÓN NUTRICIONAL:** Los niños/as de las familias que deseen participar recibirán de forma gratuita una de las dos leches de crecimiento del estudio durante todo el segundo año de vida (50% de probabilidad para cada una). Estas dos leches tendrán el mismo contenido energético (48 Kcal/100 ml) (calorías similares a la leche de vaca semidesnatada) y se diferenciarán en las proporciones de proteínas y grasas. Una de las leches tendrá 2.95g de proteínas y 1.1g de grasas (en 100ml), mientras que la otra tendrá 0.72g de proteínas y 2.11g de grasas (en 100ml). Estas proporciones se encuentran comprendidas entre las proporciones contenidas en la leche materna y la leche de vaca de consumo habitual. En ningún momento del estudio, ni los investigadores ni las familias conocerán cuál de estas leches consume cada participante.

**METODOLOGÍA:** En este estudio participaran unos 1618 niños de Múnich (Alemania) y Reus/Tarragona. La participación en el estudio tiene una duración de 5 años. Los participantes recibirán una de las dos leches de crecimiento desde el año hasta los 2 años de vida y se evaluará su crecimiento, desarrollo y estado nutricional y de salud a las siguientes edades: 1 año, 1.5 años, 2, 4 y 6 años (en total 5 visitas a lo largo de 5 años). La recogida de datos se llevará a cabo mediante las siguientes evaluaciones y procedimientos en diferentes momentos del seguimiento (que se detallan en la Tabla 1):

- Cuestionarios de salud completados por los padres (o persona a cargo del niño/a)
- Entrevistas telefónicas breves con el equipo de investigación (para revisar la alimentación)
- Exámenes (siempre voluntarios) realizados al niño/a, como:
  - Valoración del crecimiento y la composición corporal a través de medidas antropométricas.
  - Valoración de la composición corporal a través de desplazamiento de aire (se realiza sentado durante pocos minutos en una cámara cerrada llamada "BodPod").
  - Tensión arterial (a los 4 y 6 años).
  - Actividad física a los 2, 4 y 6 años: la evaluación de la actividad física se realizará mediante cuestionarios específicos, completados por los padres (o persona a cargo del niño/a) y medida a

través de un monitor de actividad física o acelerómetro (Actigraph). El Actigraph es un monitor de actividad física (tipo acelerómetro) que consiste en un pequeño equipamiento médico (peso aproximado: 20gr) que se lleva en la cintura o cadera con un cinturón. Este equipamiento mide la actividad física, el sueño y el gasto energético. El procedimiento consiste en llevar el dispositivo unos 5-7 días para medir la actividad diurna (no hace falta llevarlo por la noche). Después, el dispositivo se retorna al personal del estudio para que extraigan de él los datos.

- Análisis de sangre: la extracción de sangre será realizada por personal cualificado a los 1, 2 y 6 años.
- Análisis de orina: los padres o cuidadores recogerán varias muestras de orina al participante a lo largo del estudio; esta recogida se efectuará mediante una bolsita para lactantes o mediante un tubo convencional de recogida de orina (material que les proporcionará de forma gratuita el equipo investigador) y se entregará en el momento de la visita.

**CIRCUNSTANCIAS EN LAS CUALES LA PARTICIPACIÓN DEL SUJETO SE CONSIDERA FINALIZADA:** En caso que el participante lo comunique o deje de acudir a las visitas. Mientras el participante no comunique su decisión de dejar de participar, el equipo de investigación seguirá invitándolo a asistir a las visitas. Asimismo, los participantes que no deseen continuar participando en el estudio o que no puedan seguir consumiendo el producto de estudio, serán invitados a acudir a una última visita a los 2 o 6 años.

**EFFECTOS ADVERSOS:** Basados en investigaciones previas, no se espera ningún efecto indeseable por el consumo de la leche de estudio. En cualquier caso, dispondrán de teléfonos de contacto para notificar cualquier incidencia o realizarnos cualquier pregunta. Así mismo, si su hijo/a ha de ser ingresado/a en algún momento por cualquier motivo, rogamos nos lo hagan saber.

**RIESGOS:** El estudio no supone **ningún riesgo** que no sea el derivado de una extracción sanguínea. Las extracciones de sangre son analíticas normales, que realizará una enfermera con gran experiencia, y pueden causar las molestias propias de un pinchazo. La valoración del volumen corporal a través del desplazamiento de aire es una técnica totalmente segura que no provoca ninguna molestia. El uso del monitor para medir la actividad física no conlleva ningún riesgo. El dispositivo cumple con todos los requisitos de la Unión Europea por lo que respecta a dispositivos médicos de Clase I. En todo momento se tomarán precauciones para evitar al máximo cualquier inconveniente.

De todas formas, pueden seguir participando en el estudio, aunque decidan no realizar alguno de los exámenes anteriormente descritos.

**BENEFICIOS:** Aunque este proyecto no les promete ninguna ventaja directa, ustedes contribuirán a un mejor conocimiento de la importancia de la alimentación infantil sobre la obesidad infantil y el riesgo de padecer enfermedades cardiovasculares y posiblemente su participación servirá de ayuda a otras personas con estos problemas en el futuro.

## DERECHOS DE LOS PARTICIPANTES

**USO DE LAS MUESTRAS BIOLÓGICAS:** Servirán para llevar a cabo determinaciones bioquímicas, metabólicas, epigenéticas y genéticas relacionadas con el objetivo del estudio (la obesidad y las enfermedades cardiovasculares). En primer lugar, se analizarán parámetros del estado nutricional general, los resultados de los cuales serán comunicados a las familias.

Una parte de las muestras de sangre y las muestras de orina serán enviadas anonimizadas a los laboratorios centrales del proyecto en Múnich (Labor für Stoffwechsel & Ernährung, Hauner Childrens Hospital y Laboratoriumsmedizin, KUM). Otras muestras codificadas pueden ser enviadas a Nestec, en Suiza, o a sus filiales o a terceros para hacer otros análisis. Usted puede decidir restringir el uso de estas muestras para

que no se lleven a cabo análisis genéticos (genes relacionados con la obesidad) indicándolo en la hoja de consentimiento.

Debido a la constante evolución del conocimiento y de las técnicas de investigación en esta área de la salud, es posible que en el futuro pueda realizarse una investigación complementaria relacionada con el objetivo del estudio. Por ello, los posibles sobrantes de las muestras de sangre y orina se preservarán en las mismas condiciones de anonimato y confidencialidad, y en un plazo máximo de 10 años serán destruidas. Ustedes pueden restringir la preservación de estas muestras indicándolo en la hoja de consentimiento. El tratamiento y uso de las muestras se realizará siguiendo lo especificado en la Ley de Investigación Biomédica (14/2007), y en el RD 1716/2011.

**PROCEDIMIENTOS NO PLANIFICADOS:** Debido a la constante evolución del conocimiento científico y las técnicas, el promotor y sus colaboradores pueden desarrollar análisis no planificados relacionados con los objetivos de este ensayo y/o relacionados con investigaciones futuras en el campo de la salud y/o nutrición. Si ustedes consintieran, las muestras biológicas sobrantes (sangre y orina) o los datos, serán almacenados bajo las mismas condiciones de anonimato y confidencialidad para poder ser reutilizadas en análisis complementarios y/o futuras investigaciones científicas (siempre relacionadas con la asociación entre la alimentación infantil, el crecimiento y la salud). Si ustedes reúsan, las muestras de su hijo/a serán almacenadas por un periodo máximo de 2 años y serán destruidas una vez el estudio y sus análisis estén terminados. Tienen el derecho de limitar el tiempo de retención y uso de estas muestras indicándolo en este consentimiento informado. Si aceptan el uso posterior de los datos y/o las muestras no planificadas en el protocolo inicialmente, serán informados y se les pedirá que den su consentimiento para estos análisis adicionales.

**DEFINICIÓN DE DATOS PERSONALES:** Datos personales son toda información que se relacione con una persona identificada o identificable. Una persona identificada o identificable es una persona natural que se puede identificar, directa o indirectamente, en particular a través de un identificador como por ejemplo un nombre o un código.

**CONFIDENCIALIDAD:** Para este estudio, las muestras biológicas obtenidas, así como toda la información recogida se codificarán con un número de forma que no aparezca ni su nombre ni su número de historia clínica. Únicamente los miembros del equipo de investigación tendrán acceso a sus datos y únicamente ellos podrán ponerse en contacto con ustedes y relacionar sus datos personales con los datos de salud recogidos. Para garantizar la calidad y seguridad del estudio, podrán supervisar la recogida de datos de salud: el monitor de calidad, las autoridades sanitarias, un representante autorizado de Nestlé y el Comité Ético de Investigación Clínica.

Se garantiza que todos los datos y resultados obtenidos serán **absolutamente confidenciales** y que se utilizarán los mecanismos necesarios para el cumplimiento de la “Ley orgánica 15/1999, del 13 de Diciembre” para la protección de datos personales, y la “Ley 14/2007 de Investigación Biomédica “. El equipo de investigación de la *Unitat de Pediatria de la Facultat de Medicina de la Universitat Rovira i Virgili* será responsable de sus datos y muestras. El equipo de investigación garantiza su confidencialidad y el hecho que las muestras y los resultados sean utilizados únicamente para las finalidades consentidas. El responsable de sus datos personales codificados (estos datos no contienen ningún nombre o dirección suya o de su familia) es Nestec Ltd., con domicilio en Avenue Nestlé 55, CH-1800, Vevey, en Suiza. Los participantes tienen derecho a acceder, cambiar y oponerse al uso de sus datos, en cualquier momento, simplemente contactando con un investigador (derechos otorgados por Ley 15/1999). Tengan en cuenta que tienen además los derechos de ver y acceder a sus datos, de borrarlos, limitar su procesamiento o la transferencia, presentar una objeción al tratamiento en las circunstancias y los términos especificados en la normativa anterior (derecho concedido por la Ley 15/1999 y 18/2018 Coll., sobre protección de datos de

carácter personal y Reglamento UE 2016/679 del Parlamento Europeo y del Consejo de 27 de abril de 2016). No obstante, el promotor se reserva el derecho de no borrar los datos recogidos antes de retirar su consentimiento y que ya se hayan analizado como parte del estudio. Tienen el derecho de solicitar información sobre los datos del estudio recogidos por los doctores del mismo o por el promotor y sus afiliados (o representantes). Si desean ejercer estos derechos, o presentar una reclamación o solicitar la corrección de cualquier inexactitud de estos datos, pónganse en contacto con el médico del estudio o con el agente de protección de datos del Centro (*Unitat de Recerca en Pediatria i Desenvolupament Humà*. Sant Llorenç 21. 43201 Reus. Telf.977 759364 o 977 759365).

Si decidiesen retirar su consentimiento, solo deberán comunicarlo a los investigadores, en tal caso, no se incorporarán más datos a la base de datos y, si lo desean, también pueden solicitar por escrito la destrucción de sus muestras biológicas. Toda la información recogida en las visitas y exploraciones complementarias se codifica como el resto de muestras y datos del estudio TOMI con un número de forma que aparezca ni su nombre ni su número de historia clínica.

**TRANSFERENCIA DE DATOS:** Los datos del estudio recogidos de su hijo/a serán enviados al promotor, a terceros que trabajen para el promotor y a las autoridades reguladoras si así lo reclamaran. Solamente datos codificados se almacenarán mediante un sistema informático seguro que pertenece a Medidata, empresa ubicada en todo el mundo, un tercero de Nestlé. El acceso al sistema web está restringido al personal del estudio y a los representantes del promotor. El promotor también podrá utilizar los datos del estudio para poder comercializar la fórmula del ensayo en algunos países o para publicarlos. No obstante, nada que pueda revelar su identidad ni la de su hijo/a saldrá fuera del centro.

Sus datos codificados y los de su hijo/a serán transferidos y procesados a países distintos de España, en condiciones que garanticen su confidencialidad, desde el centro a Nestlé Suiza y otros países/organizaciones internacionales que actúen en nombre del promotor. Como responsable de los datos, Nestlé ha tomado medidas contractuales, organizativas y de seguridad que aseguren el mantenimiento del nivel de protección adecuado exigido por las leyes europeas y españolas, sea cual sea la tercera parte del estudio o los países a los que se transfieran los datos. Durante estos procedimientos no se divulgará su identidad ni la de su hijo/a.

**VOLUNTARIEDAD:** Su participación en este estudio es totalmente **voluntaria**; pueden decidir no participar, o cambiar su decisión y denegar su consentimiento en cualquier momento, hecho que no afectará ni perjudicará la relación con su médico ni su atención. Para ello, únicamente deberán comunicarlo al equipo de investigación.

**INFORMACIÓN SOBRE EL ESTUDIO:** Si se dispusiera de nueva información sobre el producto en estudio que pueda influir en su decisión de continuar en el mismo, se les informará de manera oportuna. En el caso de que estas investigaciones proporcionen datos que pudieran ser clínica o genéticamente relevantes para ustedes e interesar a su salud o a la de su familia, les serán comunicados salvo que indiquen expresamente que no desean recibir esta información. Aunque no deseen recibir esta información, tengan en cuenta que la ley establece que, cuando la información obtenida sea necesaria para evitar un grave perjuicio para la salud de sus familiares biológicos, un comité de expertos estudiará el caso y decidirá si es conveniente informar a los afectados o a sus representantes legales. Si por alguna razón ustedes quisieran conocer los resultados de las investigaciones que se hayan producido como consecuencia de su colaboración, podrán ponerse en contacto con los responsables del proyecto, que les informarán debidamente.

**COMPENSACIÓN:** Ustedes no recibirán incentivos económicos para participar en el estudio, pero recibirán una compensación que minimice el coste de tiempo y desplazamiento por acudir a la visita.

**FONDO DE FINANCIACIÓN:** Este estudio recibe soporte económico de Nestec Ltd., Avenue Nestlé 55 CH-1800 Vevey, Switzerland. Esta compañía es tomadora de un **seguro de responsabilidad** (contratado con la compañía Zurich Insurance plc., con nº de póliza Z140955 para el Hospital Universitari de Tarragona Joan XXIII y Z140963 para el Hospital Universitari Sant Joan de Reus) por cualquier posible consecuencia negativa sobre los participantes del estudio por su participación en el estudio. El promotor tiene la potestad de terminar el estudio en cualquier momento.

**OTROS ASPECTOS REGULATORIOS:** Este estudio ha sido aprobado por los Comités Éticos de Investigación Clínica del Institut d'Investigació Sanitària Pere Virgili y el de la Fundació Jordi Gol i Gorina. El estudio ha sido diseñado de acuerdo a la Declaración de Helsinki, que establece los criterios de investigación biomédica en personas de forma ética.

**Por favor, vean a continuación un esquema (Figura) en que se detallan todas las pruebas previstas en cada momento del seguimiento y ¡hagan todas las preguntas y comentarios que deseen!**

**Figura. Valoraciones que se realizan a los participantes durante el estudio**

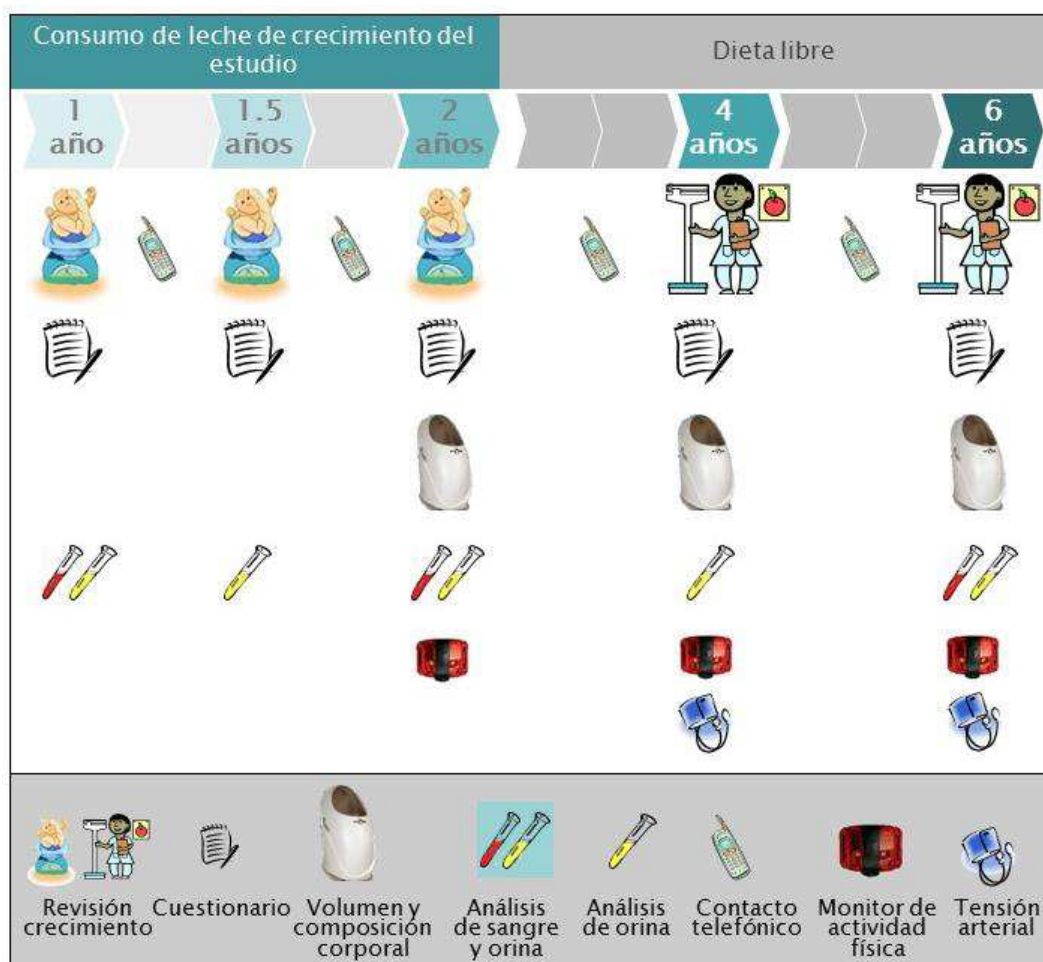

### INFORMACIÓN DE CONTACTO

Unitat de Pediatria, Facultat de Medicina. Universitat Rovira i Virgili. C/ Sant Llorenç 21, 43201 Reus.

Teléfonos: 977759365 / 977759364/ 619733840 (Tarragona)/ 616891314 (Reus)

(Copia para el participante)

**CONSENTIMIENTO INFORMADO**

Sr./Sra. .... informa al padre/madre  
Sr./Sra. .... en relación al estudio  
TOMI.

He sido informado/a sobre los derechos de mi hijo/a y los posibles riesgos y beneficios de su participación en el proyecto:

- La participación de mi hijo/a en este estudio es voluntaria.
- Se garantiza que los derechos y atención sanitaria de mi hijo/a no se verán influenciados por mi decisión.
- Los resultados relevantes que se obtengan a través de este proyecto podrán ser publicados, pero mis datos personales nunca serán revelados a no ser que lo requiera la ley.
- En el caso de que tenga cualquier duda o problema relacionado con el estudio, puedo contactar con Dr. Ricardo Closa, Dr. Joaquín Escribano, Dra. Natalia Ferré y Dra. Verónica Luque a través de los teléfonos 977759364, 977759365, 619733840 (Tarragona), 616891314 (Reus).
- Me ha sido entregada la hoja de información a los participantes y he sido informado/a de la naturaleza del estudio, que se resume en dicha hoja.
- He podido hacer preguntas para aclarar mis dudas.
- Puedo hacer cualquier pregunta en cualquier momento sobre este proyecto.
- He sido informado/a sobre mis derechos como participante en la investigación y, voluntariamente consiento en ceder mi material biológico y genético (muestras de sangre y orina) bajo las condiciones descritas y únicamente para los objetivos definidos.

Respondiendo a las preguntas de abajo declaro que:

- Deseo ser informado de los resultados clínicamente relevantes. Si  No
- Accedo a los análisis genéticos y epigenéticos opcionales que se realizaran dentro del marco de este estudio. Si  No
- Acepto que las muestras y datos sean utilizados y almacenados más tiempo que para los objetivos concretos del estudio y puedan ser utilizadas en futuros estudios científicos dentro del campo de la salud o la nutrición. Si  No
- Si la respuesta a la pregunta 3 es "No": Accedo a que se me contacte en un futuro en el caso de que estime oportuno añadir nuevos datos a los recogidos inicialmente o muestras biológicas adicionales. Si  No

| Firma del padre/ tutor                                                                                                                                                                                                                                                                                                                                                                                                                                                                                                                                                                          | Firma de la madre/ tutor | Firma del informador                                                                                                                                                                                                                                                                                                                                                                                                        |
|-------------------------------------------------------------------------------------------------------------------------------------------------------------------------------------------------------------------------------------------------------------------------------------------------------------------------------------------------------------------------------------------------------------------------------------------------------------------------------------------------------------------------------------------------------------------------------------------------|--------------------------|-----------------------------------------------------------------------------------------------------------------------------------------------------------------------------------------------------------------------------------------------------------------------------------------------------------------------------------------------------------------------------------------------------------------------------|
| Fecha __/__/____<br>Su firma indica que usted ha leído y entiende la información antedicha, que usted ha discutido este estudio con la persona que obtiene este consentimiento, que usted ha decidido participar basado en la información proporcionada, y que se le ha dado a usted una copia de este formulario.<br>En caso que únicamente uno de los dos progenitores o cuidadores legales esté presente en esta entrevista, su firma implica que el otro progenitor está de acuerdo. De todas formas se le facilitará una hoja de firma para que esta sea entregada en la siguiente visita. | Fecha __/__/____         | Fecha __/__/____<br>Declaro que los requisitos para el consentimiento informado para este proyecto han sido satisfechos, que he proporcionado al participante una copia de este formulario, discutido con él/ella el proyecto y le he explicado en términos no técnicos la información contenida en este documento. Igualmente, certifico que animé al participante a que hiciera preguntas y que todas fueron contestadas. |

(Copia para el investigador)

**CONSENTIMIENTO INFORMADO**

ID: \_\_\_\_\_

Sr./Sra. .... informa al padre/madre  
 Sr./Sra. .... en relación al estudio  
 TOMI.

He sido informado/a sobre los derechos de mi hijo/a y los posibles riesgos y beneficios de su participación en el proyecto:

- La participación de mi hijo/a en este estudio es voluntaria.
- Se garantiza que los derechos y atención sanitaria de mi hijo/a no se verán influenciados por mi decisión.
- Los resultados relevantes que se obtengan a través de este proyecto podrán ser publicados pero mis datos personales nunca serán revelados a no ser que lo requiera la ley.
- En el caso de que tenga cualquier duda o problema relacionado con el estudio, puedo contactar con Dr. Ricardo Closa, Dr. Joaquín Escribano, Dra. Natalia Ferré y Dra. Verónica Luque a través de los teléfonos 977759364, 977759365, 619733840 (Tarragona), 616891314 (Reus).
- Me ha sido entregada la hoja de información a los participantes y he sido informado/a de la naturaleza del estudio, que se resume en dicha hoja.
- He podido hacer preguntas para aclarar mis dudas.
- Puedo hacer cualquier pregunta en cualquier momento sobre este proyecto.
- He sido informado sobre mis derechos como participante en la investigación y, voluntariamente consiento en ceder mi material biológico y genético (muestras de sangre y orina) bajo las condiciones descritas y únicamente para los objetivos definidos.

Respondiendo a las preguntas de abajo declaro que:

- Deseo ser informado de los resultados clínicamente relevantes. Si  No
- Accedo a los análisis genéticos y epigenéticos opcionales que se realizaran dentro del marco de este estudio. Si  No
- Acepto que las muestras y datos sean utilizados y almacenados más tiempo que para los objetivos concretos del estudio y puedan ser utilizadas en futuros estudios científicos dentro del campo de la salud o la nutrición. Si  No
- Si la respuesta a la pregunta 3 es "No": Accedo a que se me contacte en un futuro en el caso de que estime oportuno añadir nuevos datos a los recogidos inicialmente o muestras biológicas adicionales. Si  No

| Firma del padre/ tutor                                                                                                                                                                                                                                                                                                                                                                                                                                                                                                                                                                          | Firma de la madre/ tutor | Firma del informador                                                                                                                                                                                                                                                                                                                                                                                                        |
|-------------------------------------------------------------------------------------------------------------------------------------------------------------------------------------------------------------------------------------------------------------------------------------------------------------------------------------------------------------------------------------------------------------------------------------------------------------------------------------------------------------------------------------------------------------------------------------------------|--------------------------|-----------------------------------------------------------------------------------------------------------------------------------------------------------------------------------------------------------------------------------------------------------------------------------------------------------------------------------------------------------------------------------------------------------------------------|
| Fecha __/__/____<br>Su firma indica que usted ha leído y entiende la información antedicha, que usted ha discutido este estudio con la persona que obtiene este consentimiento, que usted ha decidido participar basado en la información proporcionada, y que se le ha dado a usted una copia de este formulario.<br>En caso que únicamente uno de los dos progenitores o cuidadores legales esté presente en esta entrevista, su firma implica que el otro progenitor está de acuerdo. De todas formas se le facilitará una hoja de firma para que esta sea entregada en la siguiente visita. | Fecha __/__/____         | Fecha __/__/____<br>Declaro que los requisitos para el consentimiento informado para este proyecto han sido satisfechos, que he proporcionado al participante una copia de este formulario, discutido con él/ella el proyecto y le he explicado en términos no técnicos la información contenida en este documento. Igualmente, certifico que animé al participante a que hiciera preguntas y que todas fueron contestadas. |

(Copia para el investigador, en caso que se obtenga posteriormente el consentimiento de uno de los dos progenitores)

**CONSENTIMIENTO INFORMADO** ID: \_\_\_\_\_

Sr./Sra. .... informa al padre/madre  
Sr./Sra. .... en relación al estudio  
TOMI.

He sido informado/a sobre los derechos de mi hijo/a y los posibles riesgos y beneficios de su participación en el proyecto:

- La participación de mi hijo/a en este estudio es voluntaria.
- Se garantiza que los derechos y atención sanitaria de mi hijo/a no se verán influenciados por mi decisión.
- Los resultados relevantes que se obtengan a través de este proyecto podrán ser publicados pero mis datos personales nunca serán revelados a no ser que lo requiera la ley.
- En el caso de que tenga cualquier duda o problema relacionado con el estudio, puedo contactar con Dr. Ricardo Closa, Dr. Joaquín Escribano, Dra. Natalia Ferré y Dra. Verónica Luque a través de los teléfonos 977759364, 977759365, 619733840 (Tarragona), 616891314 (Reus).
- Me ha sido entregada la hoja de información a los participantes y he sido informado/a de la naturaleza del estudio, que se resume en dicha hoja.
- He podido hacer preguntas para aclarar mis dudas.
- Puedo hacer cualquier pregunta en cualquier momento sobre este proyecto.
- He sido informado sobre mis derechos como participante en la investigación y, voluntariamente consiento en ceder mi material biológico y genético (muestras de sangre y orina) bajo las condiciones descritas y únicamente para los objetivos definidos.

Respondiendo a las preguntas de abajo declaro que:

- Deseo ser informado de los resultados clínicamente relevantes. Si  No
- Accedo a los análisis genéticos y epigenéticos opcionales que se realizaran dentro del marco de este estudio. Si  No
- Acepto que las muestras y datos sean utilizados y almacenados más tiempo que para los objetivos concretos del estudio y puedan ser utilizadas en futuros estudios científicos dentro del campo de la salud o la nutrición. Si  No
- Si la respuesta a la pregunta 3 es "No": Accedo a que se me contacte en un futuro en el caso de que estime oportuno añadir nuevos datos a los recogidos inicialmente o muestras biológicas adicionales. Si  No

| Firma del padre/madre/tutor                                                                                                                                                                                                                                                                                        | Firma del informador                                                                                                                                                                                                                                                                                                                                                                                                        |
|--------------------------------------------------------------------------------------------------------------------------------------------------------------------------------------------------------------------------------------------------------------------------------------------------------------------|-----------------------------------------------------------------------------------------------------------------------------------------------------------------------------------------------------------------------------------------------------------------------------------------------------------------------------------------------------------------------------------------------------------------------------|
| Fecha __/__/____<br>Su firma indica que usted ha leído y entiende la información antedicha, que usted ha discutido este estudio con la persona que obtiene este consentimiento, que usted ha decidido participar basado en la información proporcionada, y que se le ha dado a usted una copia de este formulario. | Fecha __/__/____<br>Declaro que los requisitos para el consentimiento informado para este proyecto han sido satisfechos, que he proporcionado al participante una copia de este formulario, discutido con él/ella el proyecto y le he explicado en términos no técnicos la información contenida en este documento. Igualmente, certifico que animé al participante a que hiciera preguntas y que todas fueron contestadas. |



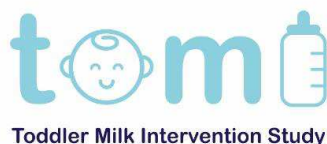

## Elterninformation und Einverständniserklärung

### *Einfluss von Milcheiweiß auf das Wachstum und die spätere Entwicklung von Übergewicht (ToMI-Studie)*

**Studienregistrierung: NCT 02907502 bei [clinicaltrials.gov](https://clinicaltrials.gov)**

*Bitte lesen Sie diese Information und Einverständniserklärung sorgfältig durch. Das Studienpersonal wird Ihnen jederzeit alle Fragen beantworten.*

*Die ToMI-Studie wurde durch die Ethikkommission und den Datenschutzbeauftragten des Klinikum der Universität München geprüft und zustimmend bewertet.*

*Sie erhalten eine Kopie dieses Schreibens für Ihre Unterlagen.*

Liebe Familie,

wir am Dr. von Haunerschen Kinderspital in München führen eine Studie zum Einfluss von Milcheiweiß auf Gewicht und Wachstum von Kindern durch. Die Studie heißt ToMI-Studie (ToMI von engl. *toddler's milk intervention* = Kleinkindermilch Intervention).

#### Warum führen wir die Studie durch

Die zunehmende Häufigkeit von Übergewicht und Fettleibigkeit (Adipositas) stellt ein großes medizinisches Problem dar. Inzwischen sind alle Altersgruppen davon betroffen, insbesondere auch Klein- und Schulkinder. Wir befassen uns sehr intensiv mit den frühkindlichen Ursachen für diese Entwicklung. Unter anderem leiten wir das weltweit größte Forschungsprojekt zu Auswirkungen der frühkindlichen Ernährung auf die Gesundheit im späteren Leben (<http://www.project-earlynutrition.eu>). Vor einigen Jahren konnten wir in einer anderen EU-finanzierten Studie („CHOP-Studie“) mit Säuglingen zeigen, dass ein niedrigerer Eiweißgehalt in der Säuglingsnahrung während des ersten Lebensjahres dazu beiträgt, dass die Kinder im Schulalter seltener übergewichtig sind.

Bei der ToMI-Studie soll nun untersucht werden, ob sich die gleiche Wirkung durch weniger Milcheiweiß auch im zweiten Lebensjahr zeigt. Dafür wurde speziell eine Kleinkindermilch mit reduziertem Eiweißgehalt hergestellt, die im Vergleich zu herkömmlicher Kleinkindermilch und Kuhmilch deutlich weniger Milcheiweiß enthält.

Neben der Ernährung ist auch das Maß an körperlicher Aktivität in der Kindheit ausschlaggebend für die gesunde Entwicklung eines Kindes. Wir wollen dabei vor allem den Zusammenhang zwischen der frühen Ernährung und dem kindlichen Aktivitätsverhalten untersuchen, aber auch mehr über mögliche Einflussgrößen für das Aktivitätsniveau Ihres Kindes herausfinden.

#### Studienzweck

Ziel der ToMI-Studie ist es, das Wachstum, die Entwicklung und den Stoffwechsel von Kleinkindern zu untersuchen, die im zweiten Lebensjahr eine eiweißreduzierte Kleinkindermilch erhalten.

#### Ablauf der Studie (siehe auch Bild 1)

Falls Sie der Teilnahme zustimmen, wird Ihr Kind zufällig entweder der herkömmlichen oder einer eiweißreduzierten Kleinkindermilch zugeteilt. Um die Studienergebnisse nicht beeinflussen zu können, werden weder Sie noch wir erfahren, welche Kindermilch Ihr Kind bekommt. Die Studienmilch soll im 2. Lebensjahr alle anderen Milchgetränke und -nahrungen, somit auch Kuhmilch, ersetzen. Sie erhalten die Studienmilch von uns kostenfrei für das gesamte zweite Lebensjahr. Mit dem zweiten Geburtstag Ihres Kindes endet die Phase, in der Ihr Kind die Studiennahrung bekommt. Insgesamt werden 1618 Kleinkinder an der ToMI-Studie teilnehmen (davon 809 in München und 809 in Reus und Tarragona in Spanien) und vom 1. bis zum 6. (72. Monat) Geburtstag beobachtet.

Im Alter von 12, 18, 24, 48 und 72 Monaten werden wir Ihr Kind im Dr. von Haunerschen Kinderspital sehen. Bei jedem Besuch werden wir Ihr Kind untersuchen und Größe, Gewicht und weitere Körpermaße aufnehmen. Wir werden Ihnen jeweils

Fragen zur Gesundheit und Verhalten Ihres Kindes stellen. Um zu erfahren, wie und wo Ihr Kind aufwächst, werden wir Sie anfangs auch zu Ihrer Herkunft, Ausbildung und Familienstruktur sowie zu Ernährungsgewohnheiten im ersten Lebensjahr befragen. Um zu verstehen wie sich Ihr Kind sonst ernährt, werden wir Sie zu jedem Zeitpunkt fragen, was und wieviel Ihr Kind in den vergangenen 24 Stunden gegessen und getrunken hat. Den Urin Ihres Kindes würden wir gerne jedes Mal untersuchen.

Im Alter von 24 und 48 Monat bitten wir Sie einen Fragebogen zur allgemeinen Entwicklung Ihres Kindes auszufüllen. Ab dem 2. Lebensjahr bestimmen wir die Körperzusammensetzung mittels BodPod®. Die BodPod®-Messung ist eine kurze, unkomplizierte Untersuchung mittels Luftverdrängung zur Bestimmung des Körperfettanteils (<http://www.bodpod.com/de/produkte/koerperzusammensetzung>).

Im Zuge der Studienbesuche mit 2, 4 und 6 Jahren wollen wir die körperliche Aktivität Ihres Kindes messen. Zusätzlich möchten wir mit Hilfe eines Fragebogens Daten über die körperliche Aktivität von Ihnen und Ihrem Kind sammeln. Die Aktivität wird mit einem Akzelerometer (wGTX3-BT, ActiGraph, Pensacola, USA) gemessen. Der Sensor wird mit Hilfe eines Gummibandes an der Hüfte Ihres Kindes befestigt. Aus den gewonnenen Daten können wir Rückschlüsse auf die tägliche Dauer und Intensität des Bewegungsverhaltens Ihres Kindes ziehen.

Eine Blutabnahme (ca. 6 ml) ist am Anfang und mit 2 und 6 Jahren vorgesehen. Wenn es gewünscht wird, können wir zuvor etwas Emla® Crème auf die Haut Ihres Kindes auftragen, um die Einstichstelle örtlich zu betäuben.

Wir werden Sie zusätzlich alle 2-6 Monate kontaktieren, Sie anfangs zum Verzehr der Studiennahrung befragen und uns kurz nach dem Wohlbefinden Ihres Kindes erkundigen.

Weitere Informationen zur Studie finden Sie auch auf unserer Homepage unter <http://www.klinikum.uni-muenchen.de/de/forschung/TOMI-Studie.html>.

Eine Beschreibung der Studie steht auch unter <http://www.clinicaltrials.gov> zur Verfügung.

Die Studiennahrung wurde von der Firma Nestec (Avenue Nestlé 55, CH - 1800 Vevey, Schweiz) für die Studie entwickelt und produziert. Die Nahrung entspricht den europäischen Richtlinien und industriellen Standards. Sie enthält 48 kcal / 100ml Energie und 0,7 g / 100ml bzw. 3,0 g / 100ml Eiweiß in der Eiweiß-reduzierten bzw. der herkömmlichen Kindermilch. Sie ist geeignet für die Ernährung von Kleinkindern im Alter von 12 bis 24 Lebensmonaten und darf nur in diesem Zeitraum durch das Studienkind konsumiert werden.

#### Familienkost, Beikost und Getränke

Natürlich darf Ihr Kind auch während der Studie seine gewohnte Kleinkinderkost bzw. Familienkost zu sich nehmen. Wir bitten Sie nur, die Milchmahlzeiten Ihres Kindes durch Studiennahrung zu ersetzen. Auch die Herstellung von Breimahlzeiten, Puddings oder ähnlicher milchhaltiger Speisen soll möglichst mit der Studienmilch erfolgen. Nach dem 2. Geburtstag sind Sie völlig frei bei der Ernährung Ihres Kindes.

#### Nutzen und Risiken bei der Teilnahme an der Studie

Durch die Teilnahme an dieser Studie bekommt Ihr Kind die Möglichkeit, eine neuartige Kleinkindermilch zu verzehren. Die Kleinkindermilch wird nach europäischen Richtlinien und industriellem Standard hergestellt. Die neuartige Kleinkindermilch enthält ausreichend Eiweiß und ist im Eiweißgehalt vergleichbar mit Muttermilch. Trotzdem kann es zu Unverträglichkeiten bei Ihrem Kind kommen. Wir erwarten jedoch keine Reaktionen, die über das normale Maß bei Verwendung von Kleinkindermilch hinausgehen.

Eine Teilnahme an der Aktivitätsmessung kann wichtige Hinweise auf das Aktivitätsverhalten Ihres Kindes liefern. Sie erhalten nach der Abgabe des Akzelerometers eine individuelle Einschätzung, welche Ihnen hilft, das Aktivitätsniveau Ihres Kindes besser zu verstehen und ggf. gezielt zu fördern.

Auch wenn das Gerät sehr robust ist und in der alltäglichen Nutzung nicht beschädigt werden kann, ist jedoch bei grober Gewalt die Ablösung von Kleinteilen möglich, die verschluckt werden können.

Das Risiko bei der Blutentnahme ist verschwindend gering. Es ist möglich, dass es zur Bildung eines blauen Flecks und in den seltensten Fällen zu Infektionen an der Einstichstelle kommt.

Falls im Verlauf der Studie wichtige neue Erkenntnisse bekannt werden, die sich auf Ihre Entscheidung über die weitere Teilnahme an dieser Studie auswirken könnten, werden Sie darüber umgehend informiert. Sie erhalten ggfs. eine neue Elterninformation und Einverständniserklärung zum Unterzeichnen, sofern Sie weiter an der Studie teilnehmen möchten.

Sie können aus der Studie ausgeschlossen werden, wenn es medizinische oder organisatorische Gründe notwendig machen. In diesem Falle werden wir Sie darüber informieren und die bis dahin erhobenen Daten anonymisiert verwenden.

#### Laboruntersuchungen

Blutwerte liefern wichtige Informationen, um die Auswirkungen der Ernährung auf den Stoffwechsel des Körpers beurteilen zu können. Entscheidend sind für uns aber nicht die einzelnen Werte Ihres Kindes – wie bei Krankheiten oder der Bewertungen durch Ihren Kinderarzt –, sondern der Mittelwert von allen ToMI-Kindern. Das bedeutet: Es sollten möglichst alle Kinder mitmachen, damit wir tatsächlich neue Erkenntnisse aus dem Blut Ihres Kindes gewinnen können! Daher hoffen wir sehr, dass Sie einer Blutentnahme bei Ihrem Kind zustimmen. In den Blut und Urinproben führen wir neben Routineuntersuchungen zur Gesundheit (z.B. Blutbild) vor allem Messungen von Stoffen durch, die mit der Eiweiß- und Energieverwertung (z.B. Harnstoff, Glukose, Blutfette) zusammenhängen. Daneben werden Hormone, die mit Wachstum und Gewichtsentwicklung im Zusammenhang stehen, bestimmt. Wir werden Sie über das Blutbild sowie die Untersuchung von Blutfetten informieren. Alle anderen Blutwerte werden erst am Ende der Studie bestimmt und dienen ausschließlich wissenschaftlichen Zwecken.

Um die Proben zu verschlüsseln, werden sie statt mit dem Namen Ihres Kindes mit einem „Pseudonym“ versehen. Das Pseudonym ist eine Kombination aus Buchstaben und Zahlen. Nur mit Hilfe von Computerprogrammen (Pseudonymisierungsschlüssel), die Kind und Pseudonym einander zuordnen, kann herausgefunden werden, welche

Probe zu welchem Kind gehört. Der Pseudonymisierungsschlüssel wird nicht an Dritte weitergegeben.

Da in der Forschung ständig neue Erkenntnisse gewonnen werden, bitten wir Sie um die Erlaubnis, eventuell überschüssige Blutproben anonymisiert (eine Zuordnung zu Ihrem Kind ist nicht mehr möglich) bis zu 10 Jahre nach Studienende aufbewahren zu dürfen, damit Blut nicht vergeudet und noch für künftige, innovative Analysen zur Verfügung steht.

### Genetische Untersuchungen

Eine Frage die uns beschäftigt ist, wie Veränderungen am Anfang des Lebens (in dieser Studie eine Veränderung der Ernährung im 2. Lebensjahr) den Stoffwechsel und die Gesundheit später beeinflussen können. Eine Möglichkeit, warum es zu einer langfristigen, eventuell lebenslangen Prägung kommen könnte, sind Veränderungen in der Steuerung der Genaktivierung. Während man vor kurzem noch glaubte, dass man Erbfaktoren, also Gene, einfach hat oder nicht hat, weiß man heute viel mehr, wie Gene „an- und ausgeschaltet“ werden können („Epigenetik“). Durch eine Untersuchung der Erbsubstanz im Blut können wir feststellen, welche für den Stoffwechsel, die Körperzusammensetzung, Übergewicht und damit einhergehende Erkrankungen relevante Gene an- oder ausgeschaltet wurden.

Wenn Sie der Untersuchung zustimmen, wird aus einer Blutprobe Ihres Kindes die Erbsubstanz (DNA) gewonnen und untersucht. Die Blutproben werden im Alter von 12, 24 und 72 Monaten gesammelt, um Veränderungen in der Steuerung der Gene feststellen zu können. Die eigentlichen genetischen Untersuchungen erfolgen erst zu einem späteren Zeitpunkt, wenn von möglichst allen Probanden die DNA zu den drei genannten Zeitpunkten gewonnen wurde.

Für die Genuntersuchung muss keine zusätzliche Blutprobe abgenommen werden. Es wird das „Abfallprodukt“ der übrigen Blutproben verwendet, die abgetrennten Blutzellen, die ansonsten für keine Untersuchung genutzt werden können. Aus diesen Zellen wird die Erbsubstanz (DNA) gewonnen und die meisten der bisher bekannten, informationsenthaltenden Abschnitte des Erbguts untersucht. Anhand dieser Informationen können wir feststellen, welche Gene an- und ausgeschaltet wurden, die für Stoffwechsel, Körperzusammensetzung und Übergewicht sowie die assoziierte Erkrankungen relevant sind. Außerdem können wir diese Veränderungen in Zusammenhang mit den vielen Einflüssen betrachten, die wir im Rahmen der Studie bei Ihrem Kind beobachten.

Aus der Untersuchung von Erbfaktoren und deren Aktivität ergibt sich für Ihr Kind kein direkter Vorteil. Mit Ihrer Teilnahme unterstützen Sie jedoch die Forschung, wie frühkindliche Ernährung und Verhaltensweisen sowie Umweltfaktoren andauernde Veränderungen verursachen. Dadurch kann möglicherweise die Grundlage für Verbesserungen in der Diagnose und Behandlung von Erkrankungen gelegt werden.

Die Untersuchungen auf Erbfaktoren werden pseudonymisiert bzw. in irreversibel anonymisierter Form am Helmholtz-Zentrum München, Institut für Molekulare Epidemiologie durchgeführt. Durch eine doppelte Kodierung (den pseudonymisierten Proben wird vor der Aufarbeitung eine fortlaufende Labor-Nummer zugeordnet) ist es den Mitarbeitern des Helmholtz-Zentrums nicht möglich, Rückschlüsse auf die persönlichen Daten des Probanden zu ziehen. Damit ist sichergestellt, dass diese

besonders sensiblen genetischen Daten zusätzlich geschützt werden. Die genetischen Untersuchungen werden nur für Forschungszwecke im Rahmen der ToMI-Studie durchgeführt. Es ist nicht möglich und nicht vorgesehen Ergebnisse mitzuteilen. Die statistische Auswertung der genetischen Daten wird unter Verantwortung von Prof. B. Koletzko durchgeführt, ohne Bezug zum Namen Ihres Kindes.

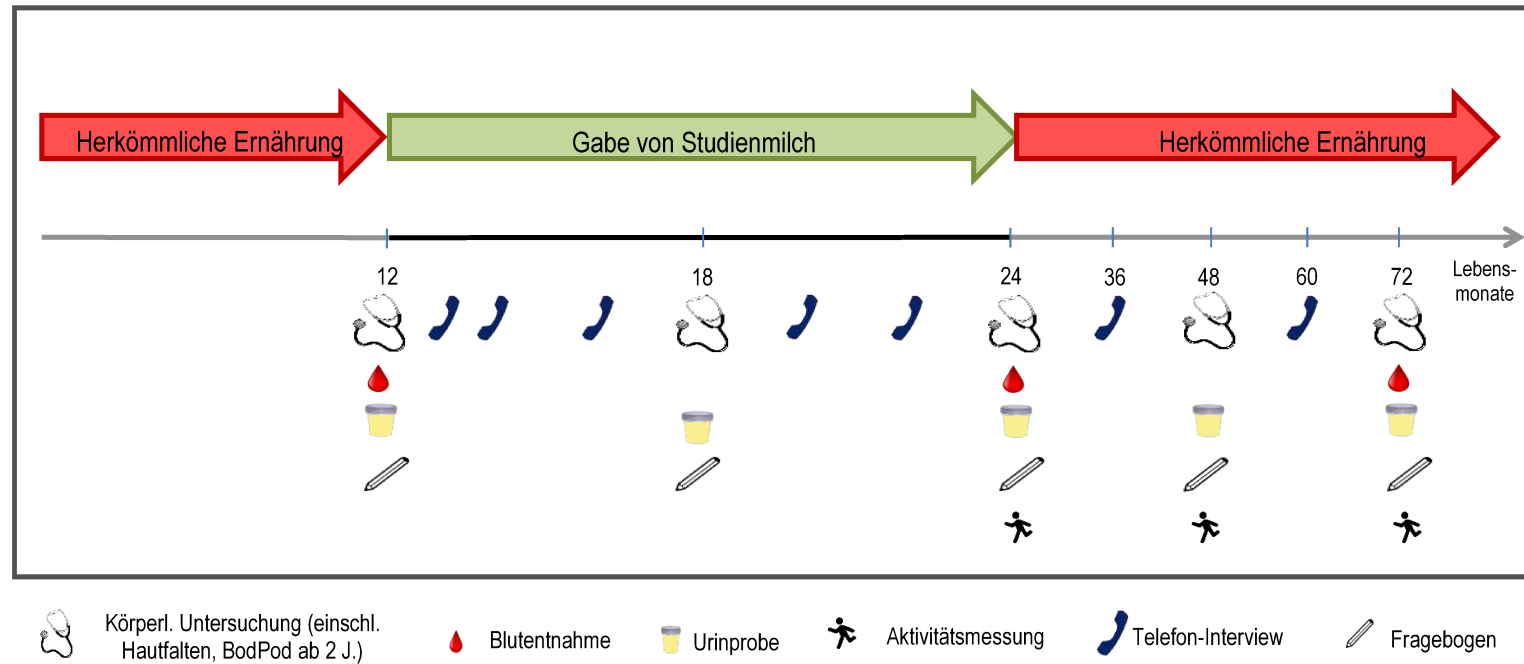

Bild 1. Ablauf der Studie

### Studienauswertung

Die Daten, Proben und Fragebögen werden ausschließlich für den oben genannten Studienzweck verwendet. Die Studienauswertung wird gemeinsam mit Nestec durchgeführt. Die Veröffentlichung von Ergebnissen und deren Interpretation erfolgt einvernehmlich.

### Studienfinanzierung

Die Studie wird durch die Firma Nestec Ltd. (Avenue Nestlé 55, CH - 1800 Vevey) finanziert. Die Finanzierung umfasst das nötige Studienpersonal, Laboruntersuchungen und die Studiennahrung. Weitere wissenschaftliche Untersuchungen werden durch öffentliche und gegebenenfalls private Finanzierungen erfolgen.

### Versicherungsschutz

Auch wenn keinerlei Komplikationen erwartet werden, so sind doch alle Studienteilnehmer durch eine Studienversicherung abgesichert. Der Versicherungsschutz erstreckt sich auf alle Gesundheitsschädigungen, die als Folge der im Zusammenhang mit der Studie angewendeten Maßnahmen eintreten bis zu einer Höchstsumme von € 5.000.000.

Im Schadensfall können Sie sich direkt an den Versicherer (Zurich Insurance plc NfD, Solmsstraße 27-37, 60486 Frankfurt am Main, Tel.: 069 7115-0; Policen-Nummer: 801.380.024.996) wenden und Ihre Ansprüche geltend machen. Um den Versicherungsschutz nicht zu gefährden, müssen Sie folgendes beachten:

- Teilen Sie uns alle medizinischen Behandlungen mit, denen sich Ihr Kind während der Studienphase unterzieht (Ausnahmen sind Vorsorgeuntersuchungen und Impfungen). Dies gilt auch für die Einnahme neuer Medikamente.
- Teilen Sie eine Gesundheitsschädigung, die als Folge der Studienteilnahme eingetreten sein könnte, bitte dem zuständigen Studienpersonal und der oben genannten Versicherungsgesellschaft mit.

### Freiwilligkeit / Rücktrittsklausel

Die Teilnahme an der Studie ist freiwillig. Mit Ihrer Einwilligung auf der „Einverständniserklärung“ geben Sie Ihr Einverständnis zur Teilnahme Ihres Kindes an dieser Studie. **Sie haben das Recht, zu jeder Zeit ohne Angabe von Gründen und ohne Nachteile die Teilnahme an der Studie zu beenden.**

### Aufwandentschädigung

Für die Teilnahme an der Studie erhalten Sie eine Aufwandsentschädigung.

Wenn Sie weitere Fragen zu dieser Studie haben oder wenn Sie der Ansicht sind, eine studienbezogene Gesundheitsschädigung erlitten zu haben, stehen wir Ihnen gern zur Verfügung: Dr. V. Grote, V.Jäger, M. Meier, S. Vogt, N. Antl, und P. Becker.

Tel:089-4400-57427; E-Mail: [Tomi.Studie@med.uni-muenchen.de](mailto:Tomi.Studie@med.uni-muenchen.de)



**Datenschutz:** Im Rahmen der Studie gelten folgende Regeln des Datenschutzes.**Datenschutz**

Bei dieser Studie werden die Vorschriften über die ärztliche Schweigepflicht und den Datenschutz entsprechend den europäischen, deutschen und bayerischen Richtlinien und der Deklaration von Helsinki eingehalten. Um Sie kontaktieren zu können, werden Ihre Kontaktdaten in einer Datenbank (MedSciNet, Stockholm, Schweden, <http://medscinet.com/>) gespeichert. In dieser Datenbank werden persönliche, jedoch keinerlei medizinischen Daten gespeichert. Zur Auslieferung der Studiennahrung erfolgt eine Weitergabe Ihrer Adressdaten an ein externes Logistik-Unternehmen (OCasa Lodilat Logistica S.L., Avda de la Astronomia 8, 28830 San Fernando de Henares, Spain). Eine Weiterverwendung dieser Daten zu anderen Zwecken als der Auslieferung der Studiennahrung ist dem Unternehmen untersagt. Das Unternehmen unterliegt den deutschen gesetzlichen Datenschutzbestimmungen.

Alle weiteren Daten – also „medizinische Daten“ –, die nicht der Kontaktaufnahme und Kontaktorganisation dienen, werden in getrennten Datenbanken (Medidata Solutions, 350 Hudson St, New York, NY 10014 sowie lokal im Klinikum der Universität München) gespeichert. Persönliche Daten wie Name oder Adresse werden in diesen Datenbanken nicht erfasst. Die Zuordnung zum Namen Ihres Kindes kann nur über einen Verschlüsselungscode erfolgen, der nur unter aktiver Hilfe des Studienpersonals einem Namen zugeordnet werden kann. So sind alle erhobenen Daten und Befunde Ihres Kindes pseudonymisiert.

Sie haben das Recht, jederzeit Auskunft über Ihre gespeicherten personenbezogenen Daten zu erhalten, diese zu berichtigen oder ggf. löschen zu lassen. Verantwortlich für die Datenverarbeitung ist Prof Dr. Berthold Koletzko sowie Dr. Veit Grote als dessen Stellvertreter.

**Kontaktdaten der Datenschutzbeauftragten:**

Bei Beschwerden haben Sie das Recht sich an die jeweilige Datenschutz-Aufsichtsbehörde zu wenden. Der lokale Datenschutzbeauftragte für das Klinikum der Universität München ist:

Herr Gerhard Meyer  
Klinikum der Universität München  
Pettenkoferstr. 8  
80336 München  
E-Mail: [datenschutz@med.uni-muenchen.de](mailto:datenschutz@med.uni-muenchen.de)

Die übergeordnete Behörde für die LMU und das Klinikum ist:

Bayerischer Landesbeauftragter für den Datenschutz (BayLfD)  
Postanschrift: Postfach 22 12 19, 80502 München  
Hausanschrift: Wagmüllerstr. 18, 80538 München  
Tel.: 089 212672-0  
Fax: 089 212672-50

**Datenzugang:**

Der Zugang zu den Adressdaten und zum Verschlüsselungscode ist auf folgende Personen der Studienorganisation beschränkt: Prof. B. Koletzko, Dr. V. Grote, V. Jäger, M. Meier, S. Vogt, N. Antl, P. Becker und U. Handel. Weitere Personen aus dem Studienzentrum (Dr. von Haunersches Kinderspital, Abt. Stoffwechsel und Ernährungsmedizin unter der Leitung von Prof. B. Koletzko) können zur Studienorganisation im Verlauf der Studie nach Zustimmung der Studienleitung Zugang erhalten. Die Firma Nestec hat darüber hinaus die Firma PAREXEL International GmbH beauftragt, die Qualität der Studie vor Ort zu überwachen (sog. „Monitoring“). Das Unternehmen wird zum Datenschutz verpflichtet und hat vor Ort Zugang zu persönlichen und medizinischen Daten. Eine Entschlüsselung einzelner Studienteilnehmer erfolgt lediglich in Fällen, in denen es die Sicherheit erfordert („medizinische Gründe“). Das Unternehmen unterliegt den deutschen, gesetzlichen Datenschutzbestimmungen.

Die Firma Nestec hat kontinuierlichen Zugang zu pseudonymisierten Daten, jedoch nie zu den Kontaktdaten. Diese pseudonymisierten Daten werden von Nestec auch in anderen Ländern als Deutschland oder der Schweiz (Sitz von Nestec) verarbeitet. Hierbei wird Ihre Identität gewahrt und die Vertraulichkeit Ihrer Daten gewährleistet. Es gelten für diese Drittländer /internationale Organisationen vertraglich die europäischen und deutschen gesetzlichen Datenschutzbestimmungen. Einige Stoffwechseluntersuchungen werden in den Laboratorien der Firma Nestec, Avenue Nestlé 55, CH - 1800 Vevey, Schweiz durchgeführt. Die genetischen und epigenetischen Analysen werden in Zusammenarbeit mit dem Helmholtz-Zentrum, Institut für Molekulare Epidemiologie, München erstellt. Alle anderen Untersuchungen werden in Laboratorien des Klinikums der Universität München durchgeführt. Die Blutproben werden hierzu nur mit dem Verschlüsselungscode weitergegeben und lassen keinen direkten Rückschluss auf den Studienteilnehmer zu. Für die genetischen und epigenetischen Analysen wird eine erneute 2. Verschlüsselung durch die Mitarbeiter des Helmholtz-Zentrums durchgeführt. Diese doppelte Kodierung stellt sicher, dass die genetischen und epigenetischen Daten zusätzlich geschützt werden. Eine Entblindung ist nur durch das Studienzentrum, nicht aber durch die Mitarbeiter des Helmholtz-Zentrums möglich.

Im Falle des Widerrufs der Einwilligung werden der Name und Ihre persönlichen Kontaktdaten aus unserer Datenbank gelöscht. Die bis dahin gespeicherten Daten Ihres Kindes werden nun anonymisiert verwendet. Außerdem werden die Kontaktdaten aller Studienteilnehmer innerhalb eines Monats nach Abschluss der Studie gelöscht. Die schriftlichen Unterlagen, inklusive dieser Einverständniserklärung, werden im Dr. von Haunerschen Kinderspital bis zum Ende der Studie und in einem dafür geeigneten Lager bis zum Ablauf der gesetzlichen Aufbewahrungsfrist (12 Jahre nach Studienende) aufbewahrt.

Im Falle von Veröffentlichungen der Studienergebnisse bleibt die Vertraulichkeit der persönlichen Daten Ihres Kindes ebenfalls gewährleistet, denn die Daten werden, wenn überhaupt, in anonymisierter Form wiedergegeben.

Auf Wunsch werden wir Sie über allgemeine Studienergebnisse informieren.

Im Falle von zusätzlichen, bisher nicht geplanten Untersuchungen oder Datenerhebungen, die über den oben genannten Studienablauf hinausgehen, werden wir das zustimmende Votum der zuständigen Ethikkommission einholen.

Vor der Einwilligung in die Studie haben Sie hier die Möglichkeit gezielt Fragen zu notieren, die noch ausführlicher mit Ihnen besprochen werden sollen.

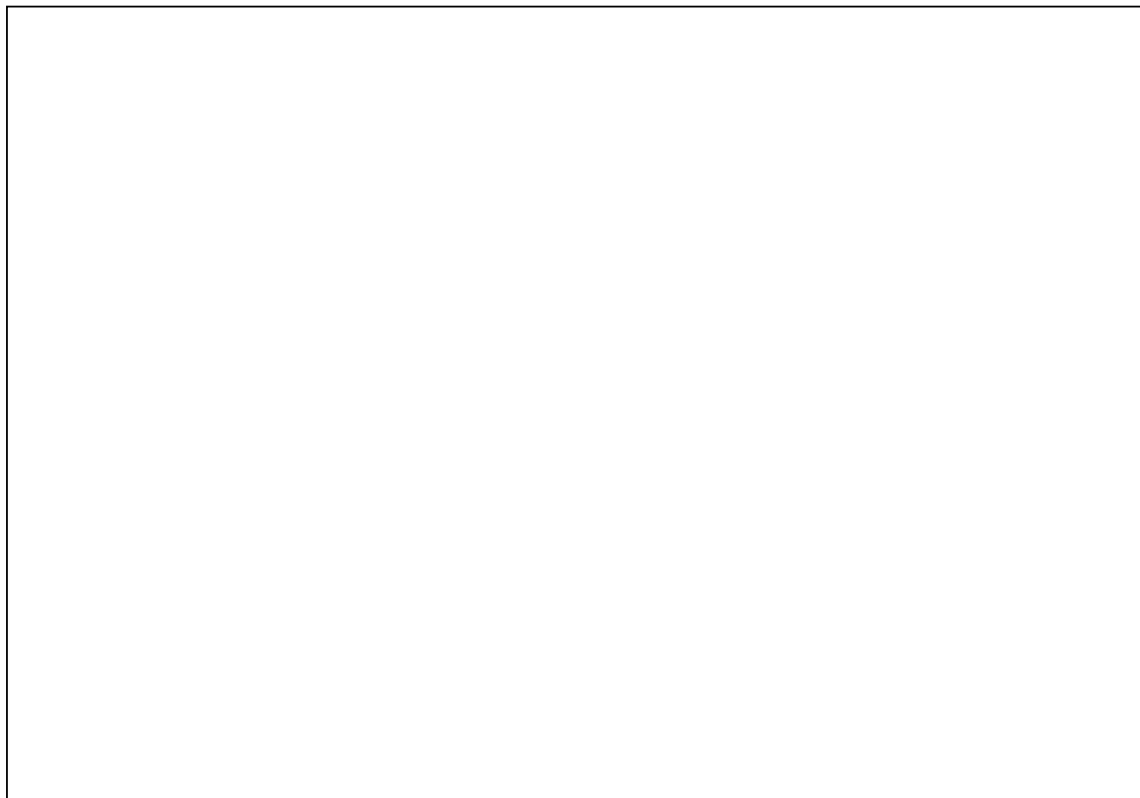

## Einverständniserklärung & Datenschutzerklärung für die Teilnahme meines/unseres Kindes

### *Einfluss von Milcheiweiß auf das Wachstum und die spätere Entwicklung von Übergewicht (ToMI-Studie)*

\_\_\_\_\_  
Name, Vorname des Kindes

\_\_\_\_\_  
Geburtsdatum

Ich erkläre, dass mir die Studienbedingungen vollständig erläutert wurden und alle Fragen zu meiner Zufriedenheit geklärt wurden. Das Formblatt mit den Studieninformationen habe ich erhalten. Ich hatte ausreichend Zeit, dieses Formblatt zu lesen und Fragen zu stellen. Mögliche Risiken und Nachteile für mein Kind wurden mir erklärt. Ich weiß, dass ich jetzt und in Zukunft jede Frage bezüglich dieser Studie und der Untersuchungen stellen kann.

Ich weiß, dass ich/mein Kind jederzeit von der Teilnahme an der Studie zurücktreten kann, ohne dass ich dafür Gründe angeben muss oder dass mir oder meinem Kind Nachteile entstehen würden.

Hiermit willige ich in die Teilnahme meines Kindes in die Studie ein:

|                     |                                                      |                                                     |
|---------------------|------------------------------------------------------|-----------------------------------------------------|
| _____<br>Ort, Datum | _____<br>Name, Vorname<br>1. Erziehungsberechtigte/r | _____<br>Unterschrift<br>1. Erziehungsberechtigte/r |
|---------------------|------------------------------------------------------|-----------------------------------------------------|

**Ich besitze das alleinige Sorgerecht:**     Ja     Nein

|                     |                                                      |                                                     |
|---------------------|------------------------------------------------------|-----------------------------------------------------|
| _____<br>Ort, Datum | _____<br>Name, Vorname<br>2. Erziehungsberechtigte/r | _____<br>Unterschrift<br>2. Erziehungsberechtigte/r |
|---------------------|------------------------------------------------------|-----------------------------------------------------|

|                     |                                                           |                                                          |
|---------------------|-----------------------------------------------------------|----------------------------------------------------------|
| _____<br>Ort, Datum | _____<br>Name, Vorname<br>Studienpersonal (Aufklärende/r) | _____<br>Unterschrift<br>Studienpersonal (Aufklärende/r) |
|---------------------|-----------------------------------------------------------|----------------------------------------------------------|

Die Datenschutz-Information im Rahmen der Teilnehmerinformation habe ich zur Kenntnis genommen. Ich willige hiermit in die Erhebung und Verwendung der persönlichen Daten meines Kindes nach diesen Maßgaben ein.

|                     |                                                      |                                                     |
|---------------------|------------------------------------------------------|-----------------------------------------------------|
| _____<br>Ort, Datum | _____<br>Name, Vorname<br>1. Erziehungsberechtigte/r | _____<br>Unterschrift<br>1. Erziehungsberechtigte/r |
|---------------------|------------------------------------------------------|-----------------------------------------------------|

|                     |                                                      |                                                     |
|---------------------|------------------------------------------------------|-----------------------------------------------------|
| _____<br>Ort, Datum | _____<br>Name, Vorname<br>2. Erziehungsberechtigte/r | _____<br>Unterschrift<br>2. Erziehungsberechtigte/r |
|---------------------|------------------------------------------------------|-----------------------------------------------------|

|                     |                                                           |                                                          |
|---------------------|-----------------------------------------------------------|----------------------------------------------------------|
| _____<br>Ort, Datum | _____<br>Name, Vorname<br>Studienpersonal (Aufklärende/r) | _____<br>Unterschrift<br>Studienpersonal (Aufklärende/r) |
|---------------------|-----------------------------------------------------------|----------------------------------------------------------|

## **Einverständnis- & Datenschutzerklärung für die genomweite Genotypisierung und epigenetische Untersuchungen meines/unseres Kindes im Rahmen der ToMI-Studie**

### ***Einfluss von Milcheiweiß auf das Wachstum und die spätere Entwicklung von Übergewicht (ToMI-Studie)***

\_\_\_\_\_  
Name, Vorname des Kindes

\_\_\_\_\_  
Geburtsdatum

Hiermit willige ich insbesondere ein, dass aus dem Blut meines Kindes **Erbmaterial gewonnen, aufbewahrt und untersucht** werden darf. Die genomweite Genotypisierung, sowie die epigenetischen Untersuchungen dienen der Aufdeckung genetischer Ursachen von Erkrankungen und Ursachen für Übergewicht und Stoffwechselveränderungen im Rahmen der ToMI-Studie. Die Teilnahme an der Untersuchung birgt keine weiteren gesundheitlichen Risiken über die erfolgreiche Blutentnahme hinaus.

Die Daten und Untersuchungsergebnisse werden ausschließlich für das Untersuchungsziel dieser Studie verwendet. Auf die verschlüsselten Daten können nur autorisierte Mitarbeiter der Studie zugreifen. Eine Weitergabe von Daten an unberechtigte Dritte erfolgt nicht. Die im Rahmen dieser Studie gewonnenen genetischen Daten werden bis zu 10 Jahren nach Abschluss der wissenschaftlichen Untersuchung oder bis auf Widerruf aufbewahrt.

Ich weiß, dass ich jetzt und in Zukunft weitere Fragen bezüglich dieser Studie und den einzelnen Untersuchungen stellen kann. Ich weiß, dass ich jederzeit von der freiwilligen Teilnahme an der Studie zurücktreten kann, ohne dass ich hierfür Gründe angeben muss.

Ich willige freiwillig in die Erhebung, Verarbeitung und Nutzung personenbezogener Daten nach Maßgabe des Aufklärungsbogens der Studie ein. Für die Erhebung, Verarbeitung und Nutzung ist der Leiter des Forschungsvorhabens, Herr Prof. Berthold Koletzko, verantwortlich.

|                     |                                                           |                                                          |
|---------------------|-----------------------------------------------------------|----------------------------------------------------------|
| _____<br>Ort, Datum | _____<br>Name, Vorname<br>1. Erziehungsberechtigte/r      | _____<br>Unterschrift<br>1. Erziehungsberechtigte/r      |
| _____<br>Ort, Datum | _____<br>Name, Vorname<br>2. Erziehungsberechtigte/r      | _____<br>Unterschrift<br>2. Erziehungsberechtigte/r      |
| _____<br>Ort, Datum | _____<br>Name, Vorname<br>Studienpersonal (Aufklärende/r) | _____<br>Unterschrift<br>Studienpersonal (Aufklärende/r) |
